# Supplementary material
Source: publisher figshare collection journal article supplement (https://karger.figshare.com/ndownloader/files/23342681)
Supplement: Supplementary file 1 [file 23342681]

**Supplemental Figure 1: Arm span and its relation to height of the Maastricht reference population**
